# Supplementary material for: Lanthionine, a Novel Uremic Toxin, in the Vascular Calcification of Chronic Kidney Disease: The Role of Proinflammatory Cytokines
Source: MDPI journal article supplement (doi:10.3390/ijms22136875), 2021-06-26
Supplement: s1 [file s1]

**Table S1.** Correlation between lanthionine and cytokines.

| VARIABLE                                                          | CORRELATION WITH LANTHIONINE |
|-------------------------------------------------------------------|------------------------------|
| HU PDGF-BB                                                        | -0.154 ( $p = 0.434$ )       |
| HU IL-1B                                                          | 0.206 ( $p = 0.313$ )        |
| HU IL-1RA                                                         | 0.01 ( $p = 0.961$ )         |
| HU IL-4                                                           | -0.259 ( $p = 0.183$ )       |
| HU IL-5                                                           | -0.038 ( $p = 0.853$ )       |
| HU IL-6                                                           | 0.106 ( $p = 0.59$ )         |
| HU IL-7                                                           | -0.183 ( $p = 0.352$ )       |
| HU IL-8                                                           | -0.051 ( $p = 0.795$ )       |
| HU IL-9                                                           | -0.243 ( $p = 0.214$ )       |
| HU IL-10                                                          | -0.176 ( $p = 0.371$ )       |
| HU IL-12(P70)                                                     | -0.082 ( $p = 0.678$ )       |
| HU IL-13                                                          | -0.051 ( $p = 0.797$ )       |
| HU IL-17                                                          | -0.192 ( $p = 0.337$ )       |
| HU EOTAXIN                                                        | -0.245 ( $p = 0.208$ )       |
| HU FGF BASIC                                                      | -0.255 ( $p = 0.191$ )       |
| HU G-CSF                                                          | -0.125 ( $p = 0.526$ )       |
| HU IFN-G                                                          | -0.171 ( $p = 0.385$ )       |
| HU IP-10                                                          | -0.219 ( $p = 0.264$ )       |
| HU MCP-1(MCAF)                                                    | -0.156 ( $p = 0.429$ )       |
| HU MIP-1A                                                         | 0.027 ( $p = 0.89$ )         |
| HU MIP-1B                                                         | -0.051 ( $p = 0.797$ )       |
| HU RANTES                                                         | -0.025 ( $p = 0.901$ )       |
| HU TNF-A                                                          | -0.165 ( $p = 0.402$ )       |
| HU VEGF                                                           | -0.046 ( $p = 0.815$ )       |
| DATA ARE EXPRESSED AS SPEARMAN CORRELATION COEFFICIENT (P-VALUE). |                              |

HU PDGF-BB—Human platelet-derived growth factor-homodimers B; HU IL-1B—Human interleukin-1 beta; HU IL-1RA—Human interleukin-1 receptor antagonist; HU IL-4—Human interleukin-4; HU IL-5—Human interleukin-5; HU IL-6—Human interleukin-6; HU IL-7—Human interleukin-7; HU IL-8—Human interleukin-8; HU IL-9—Human interleukin-9; HU IL-10—Human interleukin-10; HU IL-12 (P70)—Human Interleukin-12 heterodimers 70 kDa; HU IL-13—Human interleukin-13; HU IL-17—Human interleukin-17; HU EOTAXIN—Human Eotaxin; HU FGF BASIC—Human basic fibroblast growth factor; HU G-CSF—Human granulocyte colony-stimulating factor; HU IFN-G—Human interferon gamma; HU IP-10—Interferon gamma-induced protein 10; HU MCP-1(MCAF)—Monocyte chemoattractant protein-1/monocyte chemotactic and activating factor; HU MIP-1A—Macrophage inflammatory protein-1 alpha; HU MIP-1B—Macrophage inflammatory protein-1 beta; HU RANTES—Human RANTES protein; HU TNF-A—Human tumor necrosis factor alpha; HU VEGF—Human vascular endothelial growth factor.

**Table S2.** Characteristics of patients in whom lanthionine was measured.

| Patient | Sex | Age | Lanthionine<br>( $\mu\text{M}$ ) | GFR<br>( $\text{ml/min/1.73 m}^2$ ) | Agatston Score |
|---------|-----|-----|----------------------------------|-------------------------------------|----------------|
| 1       | F   | 35  | ND                               | 190                                 | 0              |
| 2       | M   | 45  | ND                               | 175                                 | 1              |
| 3       | M   | 67  | 1.076                            | 168                                 | 2              |
| 4       | M   | 62  | 0.614                            | 140                                 | 0              |

|    |   |    |       |     |   |
|----|---|----|-------|-----|---|
| 5  | F | 69 | ND    | 133 | 0 |
| 6  | M | 56 | ND    | 128 | 0 |
| 7  | M | 68 | ND    | 122 | 3 |
| 8  | F | 47 | 1.130 | 113 | 0 |
| 9  | F | 53 | ND    | 112 | 0 |
| 10 | M | 73 | ND    | 110 | 3 |
| 11 | M | 50 | ND    | 109 | 0 |
| 12 | M | 66 | 0.681 | 106 | 1 |
| 13 | M | 59 | 0.742 | 99  | 0 |
| 14 | M | 79 | ND    | 95  | 1 |
| 15 | M | 68 | ND    | 92  | 3 |
| 16 | M | 73 | ND    | 91  | 3 |
| 17 | F | 67 | 1.021 | 88  | 0 |
| 18 | F | 68 | ND    | 88  | 0 |
| 19 | M | 76 | 0.640 | 88  | 1 |
| 20 | F | 62 | ND    | 85  | 2 |
| 21 | F | 55 | 0.970 | 83  | 2 |
| 22 | M | 52 | ND    | 82  | 0 |
| 23 | M | 56 | 0.938 | 81  | 0 |
| 24 | M | 78 | ND    | 79  | 1 |
| 25 | F | 67 | ND    | 78  | 0 |
| 26 | M | 69 | ND    | 74  | 0 |
| 27 | M | 58 | 0.829 | 71  | 0 |
| 28 | M | 75 | ND    | 71  | 0 |
| 29 | M | 34 | ND    | 71  | 0 |
| 30 | M | 75 | ND    | 69  | 3 |
| 31 | M | 66 | 0.938 | 67  | 2 |
| 32 | M | 64 | ND    | 66  | 2 |
| 33 | M | 36 | ND    | 66  | 0 |
| 34 | M | 55 | 0.736 | 66  | 0 |
| 35 | M | 49 | ND    | 66  | 0 |
| 36 | F | 66 | ND    | 63  | 0 |
| 37 | F | 62 | ND    | 61  | 0 |
| 38 | F | 79 | ND    | 59  | 1 |
| 39 | M | 43 | ND    | 54  | 0 |
| 40 | M | 29 | ND    | 53  | 0 |
| 41 | M | 80 | ND    | 52  | 2 |
| 42 | M | 66 | ND    | 49  | 1 |
| 43 | M | 70 | ND    | 49  | 0 |
| 44 | M | 53 | ND    | 49  | 0 |
| 45 | M | 79 | 0.938 | 46  | 3 |
| 46 | M | 56 | ND    | 44  | 1 |
| 47 | F | 13 | ND    | 43  | 1 |
| 48 | M | 67 | 1.316 | 41  | 3 |
| 49 | F | 64 | ND    | 40  | 0 |
| 50 | M | 51 | ND    | 38  | 0 |
| 51 | M | 54 | ND    | 37  | 0 |
| 52 | M | 58 | ND    | 36  | 2 |
| 53 | M | 78 | 1.076 | 35  | 3 |

|    |   |    |       |    |   |
|----|---|----|-------|----|---|
| 54 | M | 76 | 1.072 | 35 | 2 |
| 55 | M | 43 | ND    | 35 | 0 |
| 56 | M | 13 | ND    | 34 | 1 |
| 57 | M | 75 | ND    | 33 | 1 |
| 58 | M | 72 | 0.960 | 32 | 3 |
| 59 | M | 67 | 1.255 | 32 | 3 |
| 60 | M | 61 | ND    | 32 | 3 |
| 61 | M | 71 | ND    | 31 | 3 |
| 62 | M | 43 | ND    | 29 | 0 |
| 63 | F | 66 | 0.778 | 29 | 1 |
| 64 | M | 64 | 0.925 | 28 | 1 |
| 65 | M | 74 | ND    | 25 | 1 |
| 66 | F | 67 | ND    | 22 | 1 |
| 67 | M | 71 | 0.967 | 21 | 2 |
| 68 | F | 71 | ND    | 21 | 3 |
| 69 | M | 54 | 0.762 | 19 | 1 |
| 70 | M | 37 | ND    | 18 | 0 |
| 71 | M | 52 | ND    | 14 | 0 |
| 72 | M | 81 | 1.447 | 13 | 3 |
| 73 | M | 43 | 1.528 | 13 | 1 |
| 74 | M | 45 | 0.707 | 11 | 0 |

---

ND: Not detected. Serum samples from all 74 CDK patients were analyzed for lanthionine. In 49 samples, lanthionine was below the LOQ (limit of quantification 0.2  $\mu$ M in serum matrices-ND). Patient characteristics: Sex, age, lanthionine ( $\mu$ M), Glomerular Filtration Rate (GFR ml/min/1.73 m<sup>2</sup>) and the Agatston Score based on patients' TCS (No Agatston score: 0; Agatston score 1: 1–100; Agatston score 2: 101–300; Agatston score 3 > 301).
